# Supplementary material for: Phytochemical Composition, Antibacterial, Antioxidant and Antidiabetic Potentials of Cydonia oblonga Bark
Source: Molecules. 2022 Sep 26;27(19):6360. doi: 10.3390/molecules27196360 (PMC9571850; doi:10.3390/molecules27196360)
Supplement: Supplementary file 1 [file molecules-27-06360-s001.zip › molecules-1931123-supplementary.pdf]

# Phytochemical Composition, Antibacterial, Antioxidant and Antidiabetic Potentials of *Cydonia oblonga* Bark

Shaymaa Najm Abed <sup>1</sup>, Sania Bibi <sup>2,3</sup>, Marwa Jan <sup>2</sup>, Muhammad Talha <sup>2</sup>, Noor Ul Islam <sup>4,\*</sup>, Muhammad Zahoor <sup>2,\*</sup> and Fakhria A. Al-Joufi

<sup>1</sup> Nursing Department, College of Applied Medical Sciences, Jouf University, Sakaka, 42421, Saudi Arabia

<sup>2</sup> Department of Biochemistry, University of Malakand, Chakdara 18800, Pakistan

<sup>3</sup> Department of Microbiology University of Swabi, Swabi 23562, Pakistan

<sup>4</sup> Department of Chemistry, University of Malakand, Chakdara 18800, Pakistan

Department of Pharmacology, College of Pharmacy, Jouf University, Aljof 72341, Saudi Arabia

\* Correspondence: nooruomchem@gmail.com (N.U.I.); mohammadzahoorus@yahoo.com (M.Z.)

## GC-MS characterization of purified fractions.

### GC-MS analysis of Fraction 1

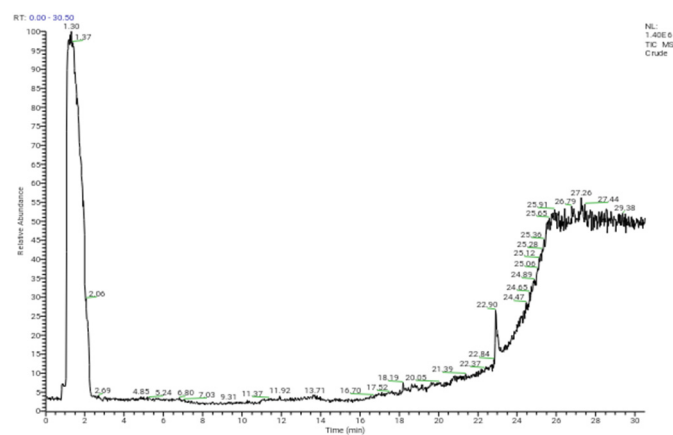

**Figure S1.** GC-MS chromatogram of fraction 1 of *Cydonia oblonga*.

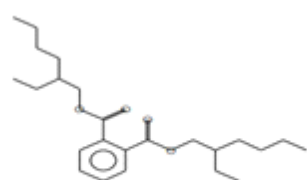

**Bis(2-ethylhexyl) phthalate**

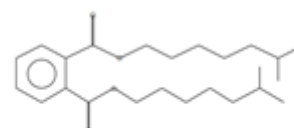

**Diisooctyl phthalate**

**Figure S2.** Major phytochemical compounds identified in Fraction 1 of *Cydonia oblonga*.

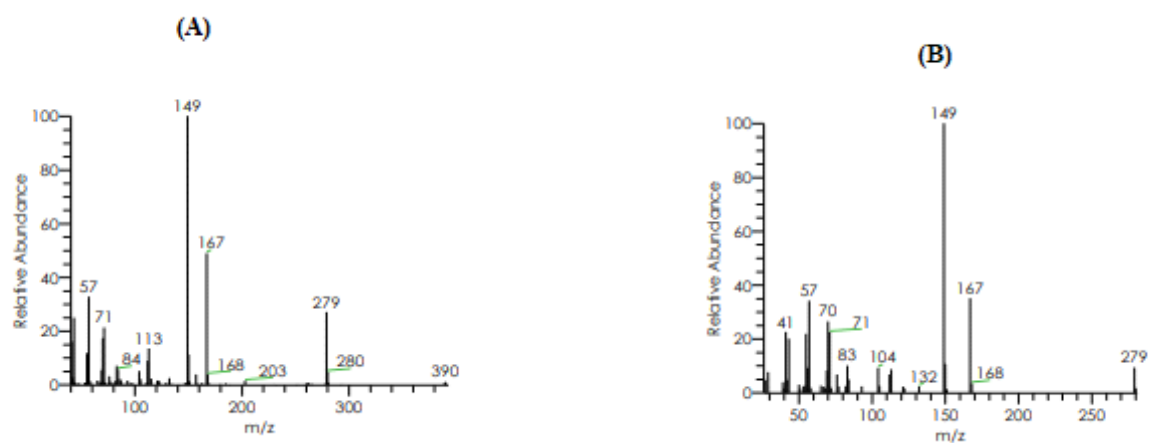

**(A)** Bis(2-ethylhexyl) phthalate

**(B)** Diisooctyl phthalate

**Figure S3.** Individual mass fragmentation of each compound.

**Table S1.** List of major components and their parameters identified in methanolic extract of *Cydonia oblonga*.

| Retention time (RT) | Molecular mass (g/mol) | Molecular formula                              | Area % | Area      | Peak height | Compound name               |
|---------------------|------------------------|------------------------------------------------|--------|-----------|-------------|-----------------------------|
| 22.90               | 390                    | C <sub>24</sub> H <sub>38</sub> O <sub>4</sub> | 0.86   | 513949.22 | 155477.32   | Bis(2-ethylhexyl) phthalate |
| 22.90               | 390                    | C <sub>24</sub> H <sub>38</sub> O <sub>4</sub> | 0.86   | 513949.22 | 155477.32   | Diisooctyl phthalate        |

### GC-MS analysis of Fraction 2

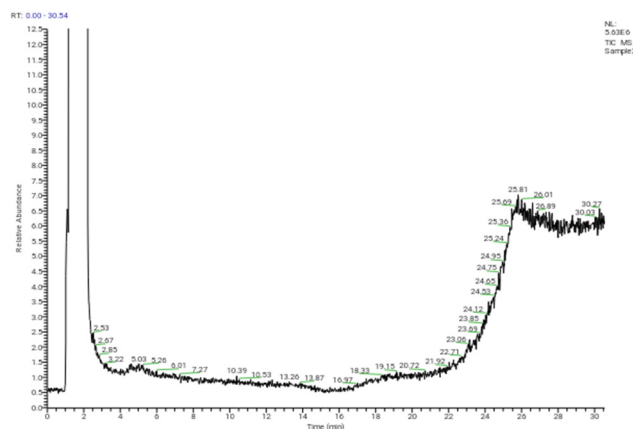

**Figure S4.** GC-MS chromatogram of Fraction 2 of *Cydonia oblonga*.

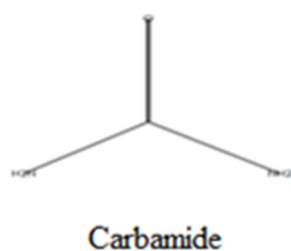

**Figure S5.** Major phytochemical compounds identified in fraction 2 of *Cydonia oblonga*.

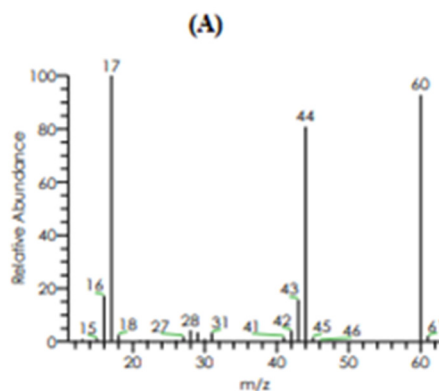

**Figure S6.** Individual mass fragmentation of compound. (A) Carbamide.

| Retention time<br>(RT) | Molecular mass<br>(g/mol) | Molecular<br>formula                         | Area % | Area        | Peak hight | Compound name |
|------------------------|---------------------------|----------------------------------------------|--------|-------------|------------|---------------|
| 2.22                   | 60                        | C <sub>2</sub> H <sub>4</sub> O <sub>2</sub> | 17.17  | 17519124.00 | 3371034.19 | Carbamide     |

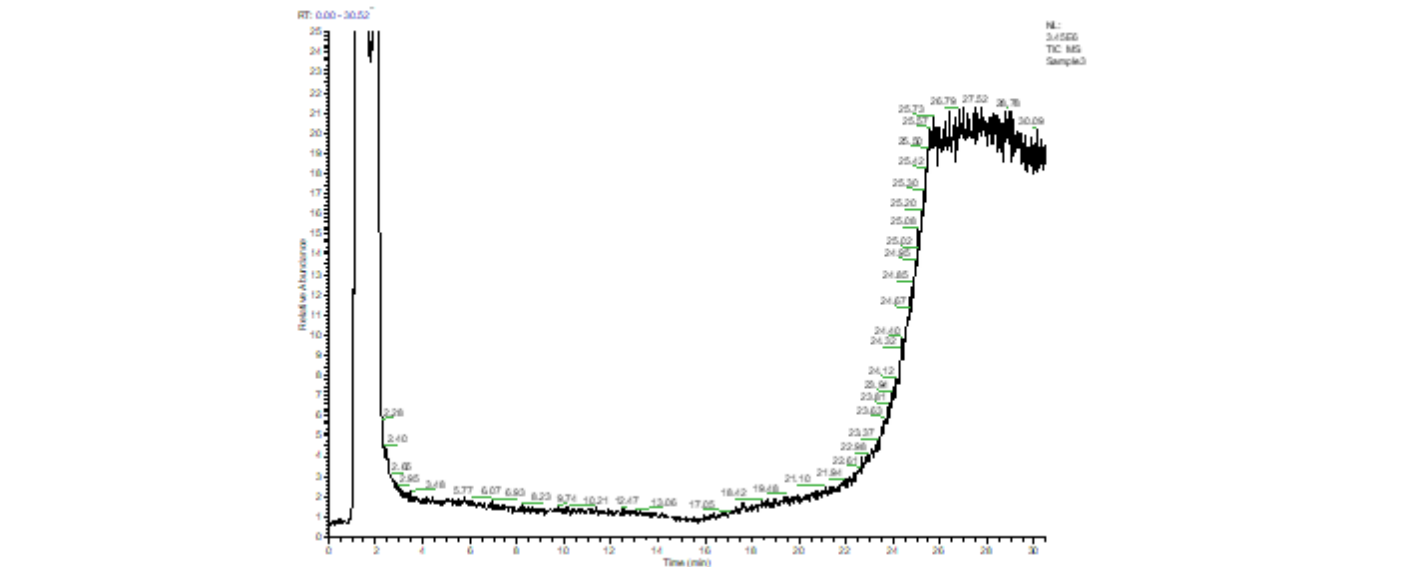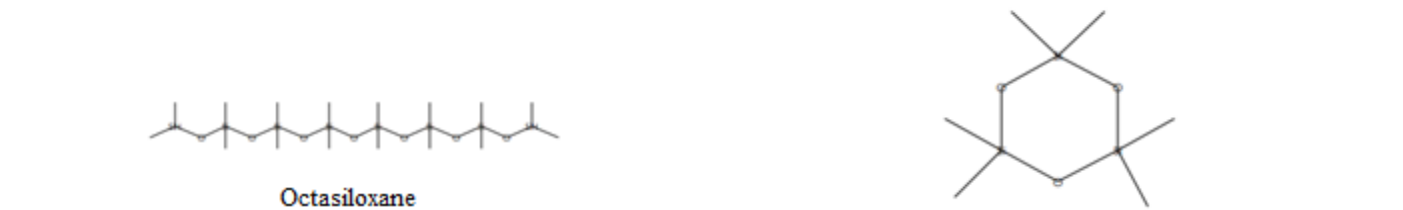

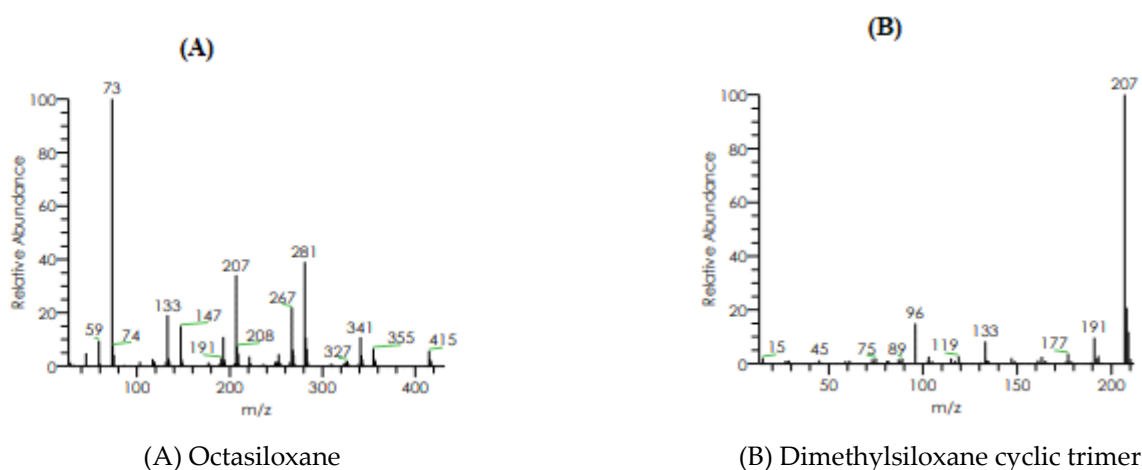

**Figure S9.** Individual mass fragmentation of Each Compound.

**Table S3.** List of major components and their parameters identified in Fraction 3 of *Cydonia oblonga*.

| Retention time (RT) | Molecular mass (g/mol) | Molecular formula                                              | Area % | Area       | Peak hight | Compound name                  |
|---------------------|------------------------|----------------------------------------------------------------|--------|------------|------------|--------------------------------|
| 25.57               | 578                    | C <sub>16</sub> H <sub>50</sub> O <sub>7</sub> Si <sub>8</sub> | 1.56   | 1288630.27 | 86531.92   | Octasiloxane                   |
| 25.57               | 222                    | C <sub>6</sub> H <sub>18</sub> O <sub>3</sub> Si <sub>3</sub>  | 1.56   | 1288630.27 | 86531.92   | Dimethylsiloxane cyclic trimer |

#### GC-MS analysis of Fraction 4

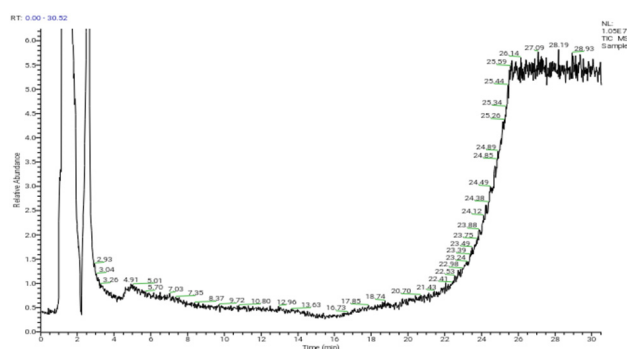

**Figure S10.** GC-MS chromatogram of Fraction 4 of *Cydonia oblonga*.

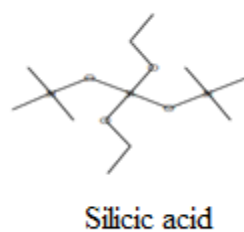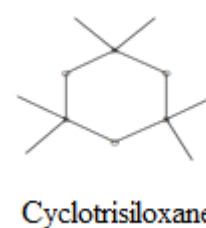

**Figure S11.** Major phytochemical compounds identified in fraction 4 of *Cydonia oblonga*.

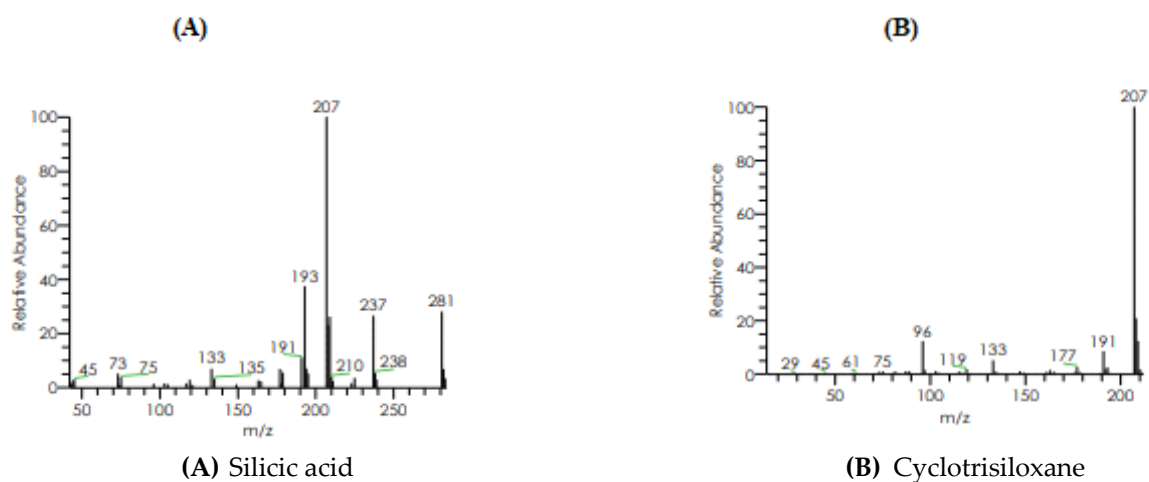

Figure S12. Individual mass fragmentation of Each Compound.

Table S4. List of major components and their parameters identified in Fraction 4 of *Cydonia oblonga*.

| Retention time (RT) | Molecular mass (g/mol) | Molecular formula                                              | Area % | Area       | Peak height | Compound name    |
|---------------------|------------------------|----------------------------------------------------------------|--------|------------|-------------|------------------|
| 25.67               | 296                    | C <sub>10</sub> H <sub>28</sub> O <sub>4</sub> Si <sub>3</sub> | 0.94   | 1036227.93 | 64734.42    | Silicic acid     |
| 25.67               | 222                    | C <sub>6</sub> H <sub>18</sub> O <sub>3</sub> Si <sub>3</sub>  | 0.94   | 1036227.93 | 64734.42    | Cyclotrisiloxane |

#### GC-MS analysis of Fraction 5

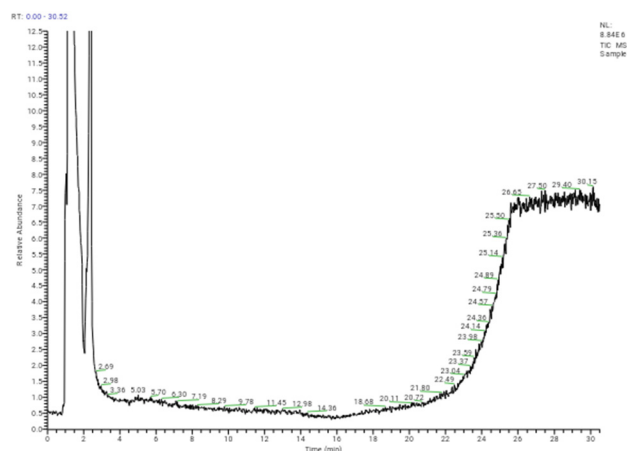

Figure S13. GC-MS chromatogram of Fraction 5 of *Cydonia oblonga*.

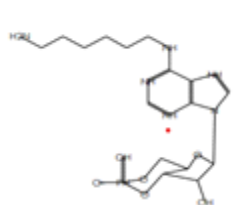

6-AH-cAMP

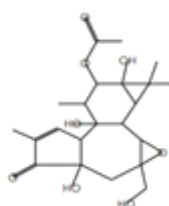

4H-Cyclopropa[5',6']benz[1',2':7,8]azole

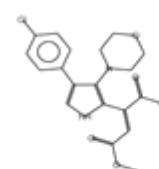

(4-(4-Chlorophenyl)-3-morpholino-pyrrol-2-yl)-

Figure S14. Major phytochemical compounds identified in fraction 5 of *Cydonia oblonga*.

Table S5. List of major components and their parameters identified in Fraction 6 of *Cydonia oblonga*.

| Retention time (RT) | Molecular mass (g/mol) | Molecular formula                                               | Area % | Area      | Peak high | Compound name                                                 |
|---------------------|------------------------|-----------------------------------------------------------------|--------|-----------|-----------|---------------------------------------------------------------|
| 25.61               | 247                    | C <sub>16</sub> H <sub>24</sub> N <sub>6</sub> O <sub>6</sub> P | 0.61   | 573972.74 | 61425.84  | 6-AH-cAMP                                                     |
| 25.61               | 422                    | C <sub>22</sub> H <sub>30</sub> O <sub>8</sub>                  | 0.61   | 573972.74 | 61425.84  | 4H-Cyclopropa[5',6']benz[1',2'.7,8]azule                      |
| 25.61               | 404                    | C <sub>20</sub> H <sub>21</sub> ClN <sub>2</sub> O <sub>5</sub> | 0.61   | 573972.74 | 61425.84  | (4-(4-Chlorphenyl)-3-morpholino-pyrrol-2-yl)-butenedioic acid |

GC-MS analysis of Fraction 6

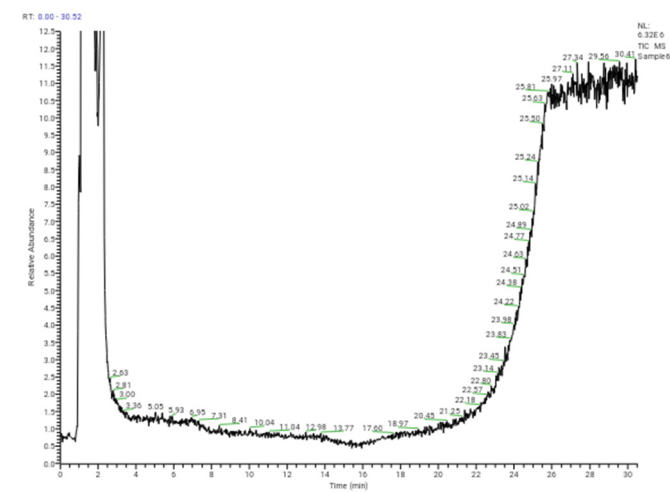

Figure S15. GC-MS chromatogram of Fraction 6 of *Cydonia oblonga*.

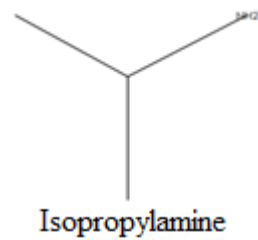

Figure S16. Major phytochemical compounds identified in fraction 6 of *Cydonia oblonga*.

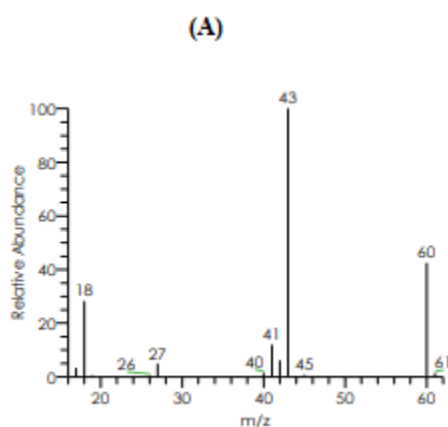

Figure S17. Individual mass fragmentation of the Compound. (A) Isopropylamine.

Table S6. List of major component and their parameters identified in Fraction 6 of *Cydonia oblonga*.

| Retention time (RT) | Molecular mass (g/mol) | Molecular formula               | Area % | Area        | Peak high  | Compound name  |
|---------------------|------------------------|---------------------------------|--------|-------------|------------|----------------|
| 2.30                | 59                     | C <sub>3</sub> H <sub>9</sub> N | 27.59  | 28847904.44 | 6067613.94 | Isopropylamine |

#### GC-MS analysis of Fraction 7

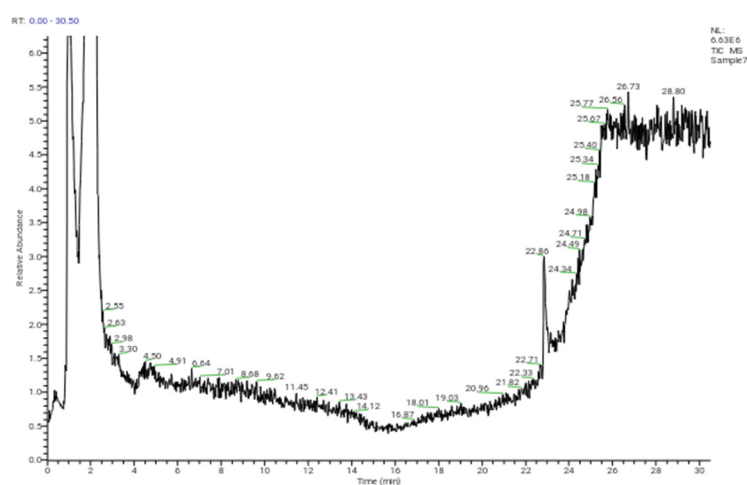

Figure S18. GC-MS chromatogram of Fraction 7 of *Cydonia oblonga*.

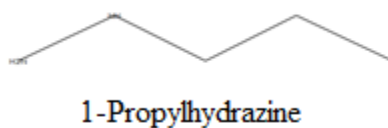

Figure S19. Major phytochemical compounds identified in fraction 7 of *Cydonia oblonga*.

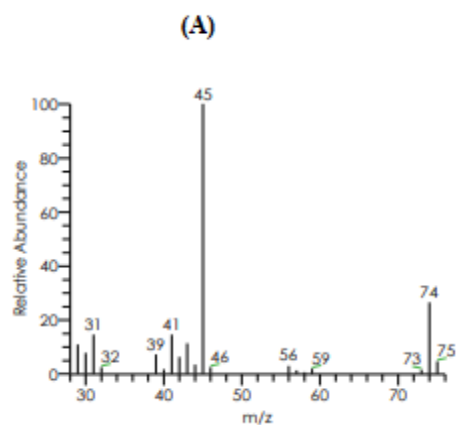

**Figure S20.** Individual mass fragmentation of the Compound. (A) 1-Propylhydrazine.

**Table S7.** List of major component and their parameters identified in Fraction 7 of *Cydonia oblonga*.

| Retention time<br>(min) | Molecular mass<br>(g/mol) | Molecular<br>formula                          | Area % | Area       | Peak hight | Compound name     |
|-------------------------|---------------------------|-----------------------------------------------|--------|------------|------------|-------------------|
| 1.04                    | 74                        | C <sub>3</sub> H <sub>10</sub> N <sub>2</sub> | 9.89   | 4594776.26 | 303885.27  | 1-Propylhydrazine |
